# Supplementary material
Source: publisher figshare collection journal article supplement (https://gsapubs.figshare.com/articles/dataset/_/18737453)
Supplement: Supplementary file 2 [file 1]

Table DR2 U-Th-Pb isotopic data

| Sample          | LA-ICPMS | Compositional Parameters |                                              |                             |                        |                         |                                        | Radiogenic Isotope Ratios              |                                        |       |                                       |        |                                       |        |
|-----------------|----------|--------------------------|----------------------------------------------|-----------------------------|------------------------|-------------------------|----------------------------------------|----------------------------------------|----------------------------------------|-------|---------------------------------------|--------|---------------------------------------|--------|
|                 |          | Th<br>U                  | <sup>206</sup> Pb*<br>x10 <sup>-13</sup> mol | mol %<br><sup>206</sup> Pb* | Pb*<br>Pb <sub>c</sub> | Pb <sub>c</sub><br>(pg) | <sup>206</sup> Pb<br><sup>204</sup> Pb | <sup>208</sup> Pb<br><sup>206</sup> Pb | <sup>207</sup> Pb<br><sup>206</sup> Pb | % err | <sup>207</sup> Pb<br><sup>235</sup> U | % err  | <sup>206</sup> Pb<br><sup>238</sup> U | % err  |
| (a)             | (b)      | (c)                      | (d)                                          | (d)                         | (d)                    | (d)                     | (e)                                    | (f)                                    | (f)                                    | (g)   | (f)                                   | (g)    | (f)                                   | (g)    |
| <b>SC18-1</b>   |          |                          |                                              |                             |                        |                         |                                        |                                        |                                        |       |                                       |        |                                       |        |
| z1              | ML7      | 0.37                     | 3.95                                         | 1.00                        | 57.30                  | 1.68                    | 3349.45                                | 0.11                                   | 0.07                                   | 0.08  | 1.6580                                | 0.1415 | 0.1664                                | 0.070  |
| z2a             | ML72     | 1.26                     | 0.67                                         | 1.00                        | 75.32                  | 0.27                    | 3765.83                                | 0.38                                   | 0.07                                   | 0.12  | 1.7732                                | 0.1899 | 0.1742                                | 0.089  |
| z2b             | ML72     | 1.26                     | 0.15                                         | 0.96                        | 8.55                   | 0.54                    | 440.64                                 | 0.38                                   | 0.07                                   | 0.67  | 1.7731                                | 0.8425 | 0.1743                                | 0.337  |
| z3              | ML83     | 0.75                     | 1.56                                         | 1.00                        | 186.81                 | 0.22                    | #####                                  | 0.23                                   | 0.08                                   | 0.08  | 1.8987                                | 0.1441 | 0.1824                                | 0.073  |
| z4              | ML95     | 1.26                     | 2.06                                         | 1.00                        | 99.18                  | 0.63                    | 4877.80                                | 0.38                                   | 0.07                                   | 0.09  | 1.7260                                | 0.1519 | 0.1710                                | 0.074  |
| z5a             | ML101    | 0.55                     | 0.08                                         | 0.97                        | 10.33                  | 0.19                    | 623.07                                 | 0.17                                   | 0.07                                   | 0.72  | 1.7559                                | 0.8475 | 0.1735                                | 0.289  |
| z5b             | ML101    | 0.50                     | 0.11                                         | 0.96                        | 7.43                   | 0.36                    | 458.36                                 | 0.15                                   | 0.07                                   | 0.81  | 1.7718                                | 0.9680 | 0.1739                                | 0.343  |
| z6              | ML105    | 0.26                     | 1.32                                         | 0.99                        | 47.99                  | 0.65                    | 2980.82                                | 0.08                                   | 0.08                                   | 0.11  | 1.8822                                | 0.1810 | 0.1813                                | 0.103  |
| z7a             | ML252    | 0.28                     | 7.41                                         | 1.00                        | 645.16                 | 0.28                    | #####                                  | 0.09                                   | 0.08                                   | 0.06  | 1.9428                                | 0.1289 | 0.1853                                | 0.071  |
| z7b             | ML252    | 0.33                     | 1.29                                         | 1.00                        | 90.32                  | 0.35                    | 5594.92                                | 0.10                                   | 0.08                                   | 0.09  | 1.9420                                | 0.1561 | 0.1852                                | 0.079  |
| z7c             | ML252    | 0.31                     | 0.38                                         | 0.99                        | 27.33                  | 0.33                    | 1715.96                                | 0.09                                   | 0.08                                   | 0.25  | 1.9483                                | 0.3265 | 0.1854                                | 0.131  |
| z8a             | ML190    | 0.41                     | 5.87                                         | 1.00                        | 195.79                 | 0.74                    | #####                                  | 0.13                                   | 0.07                                   | 0.07  | 1.7906                                | 0.1305 | 0.1754                                | 0.069  |
| z8b             | ML190    | 0.47                     | 3.74                                         | 1.00                        | 178.31                 | 0.53                    | #####                                  | 0.14                                   | 0.07                                   | 0.07  | 1.8082                                | 0.1460 | 0.1768                                | 0.0882 |
| z9              | M178     | 0.57                     | 0.13                                         | 0.96                        | 7.25                   | 0.48                    | 439.96                                 | 0.17                                   | 0.08                                   | 0.61  | 1.8830                                | 0.8274 | 0.1813                                | 0.420  |
| z10             | M213     | 0.99                     | 2.54                                         | 1.00                        | 171.82                 | 0.42                    | 9077.43                                | 0.30                                   | 0.07                                   | 0.08  | 1.7637                                | 0.1403 | 0.1737                                | 0.072  |
| z11             | M234     | 0.73                     | 1.42                                         | 1.00                        | 89.59                  | 0.43                    | 5032.36                                | 0.22                                   | 0.07                                   | 0.09  | 1.7309                                | 0.1573 | 0.1714                                | 0.077  |
| <b>NW1-61.5</b> |          |                          |                                              |                             |                        |                         |                                        |                                        |                                        |       |                                       |        |                                       |        |
| z1              | ML60     | 0.961                    | 0.9103                                       | 99.69%                      | 110                    | 0.23                    | 5858                                   | 0.291                                  | 0.075928                               | 0.106 | 1.9283                                | 0.1677 | 0.1843                                | 0.079  |
| z2a             | ML58     | 0.621                    | 0.7567                                       | 99.15%                      | 37                     | 0.54                    | 2133                                   | 0.188                                  | 0.075629                               | 0.174 | 1.9050                                | 0.2433 | 0.1828                                | 0.102  |
| z2b             | ML58     | 0.574                    | 0.719                                        | 0.993                       | 46.136                 | 0.40                    | #####                                  | 0.174                                  | 0.075643                               | 0.192 | 1.9077                                | 0.2526 | 0.1830                                | 0.093  |
| <b>AF1-29.3</b> |          |                          |                                              |                             |                        |                         |                                        |                                        |                                        |       |                                       |        |                                       |        |
| z1              | S93      | 0.447                    | 0.947                                        | 0.998                       | #####                  | 0.16                    | #####                                  | 0.136                                  | 0.073715                               | 0.089 | 1.7578                                | 0.1516 | 0.1730                                | 0.075  |
| z2              | S226     | 0.537                    | 0.167                                        | 0.983                       | 18.255                 | 0.23                    | #####                                  | 0.163                                  | 0.072543                               | 0.415 | 1.6837                                | 0.5326 | 0.1684                                | 0.240  |
| z3              | S220     | 0.387                    | 0.416                                        | 0.994                       | 51.429                 | 0.20                    | #####                                  | 0.118                                  | 0.073865                               | 0.152 | 1.7709                                | 0.2204 | 0.1740                                | 0.097  |
| z4 U-Daly       | S216     | 0.597                    | 0.057                                        | 0.962                       | 7.918                  | 0.19                    | 475.622                                | 0.181                                  | 0.074400                               | 1.503 | 1.7963                                | 1.6299 | 0.1752                                | 0.370  |
| z4 U-Farad      | S216     | 0.597                    | 0.057                                        | 0.962                       | 7.918                  | 0.19                    | 475.622                                | 0.181                                  | 0.074400                               | 1.503 | 1.7955                                | 1.6699 | 0.1751                                | 0.518  |
| z6              | S160     | 0.481                    | 0.097                                        | 0.964                       | 8.053                  | 0.30                    | 497.298                                | 0.146                                  | 0.073454                               | 0.739 | 1.7312                                | 0.8878 | 0.1710                                | 0.313  |
| z7              | S164     | 0.497                    | 0.267                                        | 0.989                       | 27.868                 | 0.24                    | #####                                  | 0.151                                  | 0.075114                               | 0.232 | 1.8752                                | 0.3068 | 0.1811                                | 0.118  |

(a) z1, z2 etc. are labels for single zircon grains or fragments annealed and chemically abraded after Mattinson (2005).

(b) Corresponding LA-ICPMS spot number in Table DR1

(c) Model Th/U ratio iteratively calculated from the radiogenic <sup>208</sup>Pb/<sup>206</sup>Pb ratio and <sup>206</sup>Pb/<sup>238</sup>U age.

(d) Pb\* and Pb<sub>c</sub> represent radiogenic and common Pb, respectively; mol % <sup>206</sup>Pb\* with respect to radiogenic, blank and initial common Pb.

(e) Measured ratio corrected for spike and fractionation only. Fractionation estimated at 0.18 +/- 0.03 ‰/a.m.u. for Daly analyses, based on analysis of N

(f) Corrected for fractionation, spike, and common Pb; up to 1 pg of common Pb was assumed to be procedural blank: <sup>206</sup>Pb/<sup>204</sup>Pb = 18.042 ± 0.61‰; 20

Excess over blank was assigned to initial common Pb, using the Stacey and Kramers (1975) two-stage Pb isotope evolution model at the nominal samp

(g) Errors are 2-sigma, propagated using the algorithms of Schmitz and Schoene (2007).

(h) Calculations are based on the decay constants of Hiess et al. (2012). <sup>206</sup>Pb/<sup>238</sup>U and <sup>207</sup>Pb/<sup>206</sup>Pb ages corrected for initial disequilibrium in <sup>230</sup>Th/.

| Isotopic Ages  |                                           |       |                                          |       |                                          |      |
|----------------|-------------------------------------------|-------|------------------------------------------|-------|------------------------------------------|------|
| corr.<br>coef. | $\frac{^{207}\text{Pb}}{^{206}\text{Pb}}$ |       | $\frac{^{207}\text{Pb}}{^{235}\text{U}}$ |       | $\frac{^{206}\text{Pb}}{^{238}\text{U}}$ |      |
|                | (h)                                       | (g)   | (h)                                      | (g)   | (h)                                      | (g)  |
| 0.950          | 992.88                                    | 1.59  | 992.63                                   | 0.90  | 992.51                                   | 0.64 |
| 0.859          | 1036.23                                   | 2.47  | 1035.70                                  | 1.23  | 1035.45                                  | 0.85 |
| 0.653          | 1035.28                                   | 13.59 | 1035.66                                  | 5.47  | 1035.85                                  | 3.22 |
| 0.931          | 1081.21                                   | 1.62  | 1080.62                                  | 0.96  | 1080.33                                  | 0.72 |
| 0.925          | 1019.45                                   | 1.79  | 1018.26                                  | 0.98  | 1017.71                                  | 0.69 |
| 0.584          | 1024.51                                   | 14.53 | 1029.34                                  | 5.48  | 1031.61                                  | 2.75 |
| 0.611          | 1038.85                                   | 16.26 | 1035.18                                  | 6.28  | 1033.44                                  | 3.27 |
| 0.863          | 1076.06                                   | 2.13  | 1074.82                                  | 1.20  | 1074.22                                  | 1.02 |
| 0.964          | 1096.61                                   | 1.26  | 1095.95                                  | 0.86  | 1095.62                                  | 0.72 |
| 0.911          | 1096.14                                   | 1.81  | 1095.68                                  | 1.05  | 1095.45                                  | 0.79 |
| 0.698          | 1101.25                                   | 5.06  | 1097.86                                  | 2.19  | 1096.15                                  | 1.32 |
| 0.967          | 1042.08                                   | 1.33  | 1042.05                                  | 0.85  | 1042.04                                  | 0.67 |
| 0.929          | 1046.24                                   | 1.45  | 1048.43                                  | 0.95  | 1049.48                                  | 0.85 |
| 0.706          | 1077.09                                   | 12.22 | 1075.12                                  | 5.49  | 1074.14                                  | 4.16 |
| 0.942          | 1032.08                                   | 1.54  | 1032.19                                  | 0.91  | 1032.25                                  | 0.69 |
| 0.904          | 1021.13                                   | 1.90  | 1020.07                                  | 1.01  | 1019.58                                  | 0.73 |
|                |                                           |       |                                          |       |                                          |      |
| 0.874          | 1092.29                                   | 2.12  | 1090.96                                  | 1.12  | 1090.30                                  | 0.79 |
| 0.795          | 1084.35                                   | 3.48  | 1082.85                                  | 1.62  | 1082.10                                  | 1.02 |
| 0.754          | 1084.73                                   | 3.85  | 1083.78                                  | 1.68  | 1083.31                                  | 0.93 |
|                |                                           |       |                                          |       |                                          |      |
| 0.908          | 1032.78                                   | 1.80  | 1030.05                                  | 0.98  | 1028.77                                  | 0.72 |
| 0.661          | 1000.29                                   | 8.43  | 1002.36                                  | 3.39  | 1003.31                                  | 2.23 |
| 0.819          | 1036.87                                   | 3.07  | 1034.85                                  | 1.43  | 1033.89                                  | 0.92 |
| 0.444          | 1051.44                                   | 30.28 | 1044.12                                  | 10.63 | 1040.63                                  | 3.55 |
| 0.462          | 1051.44                                   | 30.28 | 1043.83                                  | 10.89 | 1040.20                                  | 4.98 |
| 0.612          | 1025.60                                   | 14.95 | 1020.19                                  | 5.71  | 1017.67                                  | 2.95 |
| 0.749          | 1070.65                                   | 4.66  | 1072.37                                  | 2.03  | 1073.22                                  | 1.17 |

IBS-981 and NBS-982.

$^{17}\text{Pb}/^{204}\text{Pb} = 15.537 \pm 0.52\%$ ;  $^{208}\text{Pb}/^{204}\text{Pb} = 37.686 \pm 0.63\%$  (all uncertainties 1-sigma).

le age.

$^{238}\text{U}$  using  $\text{Th}/\text{U}$  [magma] = 3.
